# Supplementary material
Source: Springer Nature journal article supplement (https://www.springermedizin.de/resource/supplementary/12889_2013_6061_MOESM1_ESM.pdf/9494348)
Supplement: MOESM1 [file 9494348]

200 pregnant Maori women recruited in the Waikato-Tainui rohe  
Baseline socio-dental questionnaire completed

100 pregnant Maori women randomly  
recruited to intervention group

Session 1

Session 2

Session 3

**ECC  
intervention**

24-month child dental check and mother follow-up questionnaire

100 pregnant Maori women randomly  
recruited to delayed intervention

Session 1

Session 2

Session 3

**ECC  
intervention**

36-month child dental check and mother follow-up questionnaire
